# Supplementary material
Source: publisher site journal article supplement (https://www.dovepress.com/article/420529)
Supplement: Supplementary file 1 [file get_supplementary_file.php]

**Costase Ndayishimiye<sup>1,2\*</sup>, Marzena Tambor<sup>2</sup>, Katarzyna Dubas-Jakóbczyk<sup>2</sup>**

<sup>1</sup>Doctoral School of Medical and Health Sciences, Jagiellonian University Medical College, Św. Łazarza 16 St. 31-530 Krakow, Poland

<sup>2</sup>Health Economics and Social Security Department, Institute of Public Health, Jagiellonian University Medical College, Skawińska 8 St. 31-066 Krakow, Poland.

**Correspondence email:**

[costase.ndayishimiye@doctoral.uj.edu.pl](mailto:costase.ndayishimiye@doctoral.uj.edu.pl)

**Supplementary file:**

**Table S1. Search strategy in Scopus**

Date of search: 08/11/2022

| Search | Query                                                                                                                                                                                                                                                                                                                                                                                                                                                                                                                                                                                                                                                                                                                                                                                                                                                                                                                                                                                                                                                                                                                                                                                                                                                                                                                                                                                                                                                                                                                                                                                                                                                                                                                                                                                                                                                                                                                                                                                                                                                                                                                                                                                                                                                                                                                                                                                                            |
|--------|------------------------------------------------------------------------------------------------------------------------------------------------------------------------------------------------------------------------------------------------------------------------------------------------------------------------------------------------------------------------------------------------------------------------------------------------------------------------------------------------------------------------------------------------------------------------------------------------------------------------------------------------------------------------------------------------------------------------------------------------------------------------------------------------------------------------------------------------------------------------------------------------------------------------------------------------------------------------------------------------------------------------------------------------------------------------------------------------------------------------------------------------------------------------------------------------------------------------------------------------------------------------------------------------------------------------------------------------------------------------------------------------------------------------------------------------------------------------------------------------------------------------------------------------------------------------------------------------------------------------------------------------------------------------------------------------------------------------------------------------------------------------------------------------------------------------------------------------------------------------------------------------------------------------------------------------------------------------------------------------------------------------------------------------------------------------------------------------------------------------------------------------------------------------------------------------------------------------------------------------------------------------------------------------------------------------------------------------------------------------------------------------------------------|
| #46    | (( TITLE-ABS-KEY ( pay* ) ) OR ( TITLE-ABS-KEY ( compensat* ) ) OR ( TITLE-ABS-KEY ( incentive* ) ) OR ( TITLE-ABS-KEY ( financ* ) ) OR ( TITLE-ABS-KEY ( reimburs* ) ) OR ( TITLE-ABS-KEY ( purchas* ) ) OR ( TITLE-ABS-KEY ( reward* ) ) OR ( TITLE-ABS-KEY ( bonus* ) )) AND (( TITLE-ABS-KEY ( reform* ) ) OR ( TITLE-ABS-KEY ( polic* ) ) OR ( TITLE-ABS-KEY ( chang* ) )) AND (( TITLE-ABS-KEY ( "healthcare provider*" ) ) OR ( TITLE-ABS-KEY ( "care provider*" ) ) OR ( TITLE-ABS-KEY ( "health provider*" ) ) OR ( TITLE-ABS-KEY ( "health service provider*" ) ) OR ( TITLE-ABS-KEY ( "health practice*" ) ) OR ( TITLE-ABS-KEY ( "healthcare practice*" ) ) OR ( TITLE-ABS-KEY ( "medical practice*" ) ) OR ( TITLE-ABS-KEY ( "health institution*" ) ) OR ( TITLE-ABS-KEY ( "healthcare institution*" ) ) OR ( TITLE-ABS-KEY ( "health care institution*" ) )) AND (( TITLE-ABS-KEY ( factor* ) ) OR ( TITLE-ABS-KEY ( barrier* ) ) OR ( TITLE-ABS-KEY ( obstacle* ) ) OR ( TITLE-ABS-KEY ( hurdle* ) ) OR ( TITLE-ABS-KEY ( imped* ) ) OR ( TITLE-ABS-KEY ( difficult* ) ) OR ( TITLE-ABS-KEY ( challenge* ) ) OR ( TITLE-ABS-KEY ( facilitat* ) ) OR ( TITLE-ABS-KEY ( promot* ) ) OR ( TITLE-ABS-KEY ( aid* ) ) OR ( TITLE-ABS-KEY ( enabl* ) ) OR ( TITLE-ABS-KEY ( help* ) ) OR ( TITLE-ABS-KEY ( reason* ) ) OR ( TITLE-ABS-KEY ( experienc* ) ) OR ( TITLE-ABS-KEY ( perception* ) ) OR ( TITLE-ABS-KEY ( determinant* ) ) OR ( TITLE-ABS-KEY ( influenc* ) ) OR ( TITLE-ABS-KEY ( constraint* ) ) OR ( TITLE-ABS-KEY ( issue* ) )) AND ( LIMIT-TO ( PUBYEAR , 2022 ) OR LIMIT-TO ( PUBYEAR , 2021 ) OR LIMIT-TO ( PUBYEAR , 2020 ) OR LIMIT-TO ( PUBYEAR , 2019 ) OR LIMIT-TO ( PUBYEAR , 2018 ) OR LIMIT-TO ( PUBYEAR , 2017 ) OR LIMIT-TO ( PUBYEAR , 2016 ) OR LIMIT-TO ( PUBYEAR , 2015 ) OR LIMIT-TO ( PUBYEAR , 2014 ) OR LIMIT-TO ( PUBYEAR , 2013 ) OR LIMIT-TO ( PUBYEAR , 2012 ) OR LIMIT-TO ( PUBYEAR , 2011 ) OR LIMIT-TO ( PUBYEAR , 2010 ) OR LIMIT-TO ( PUBYEAR , 2009 ) OR LIMIT-TO ( PUBYEAR , 2008 ) OR LIMIT-TO ( PUBYEAR , 2007 ) OR LIMIT-TO ( PUBYEAR , 2006 ) OR LIMIT-TO ( PUBYEAR , 2005 ) OR LIMIT-TO ( PUBYEAR , 2004 ) OR LIMIT-TO ( PUBYEAR , 2003 ) OR LIMIT-TO ( PUBYEAR , 2002 ) OR LIMIT-TO ( PUBYEAR , 2001 ) OR LIMIT-TO ( PUBYEAR , 2000 ) ) AND ( LIMIT-TO ( LANGUAGE , "English" ) ) AND ( LIMIT-TO ( SRCTYPE , "j" ) OR LIMIT-TO ( SRCTYPE , "b" ) ) |
| #45    | (( TITLE-ABS-KEY ( pay* ) ) OR ( TITLE-ABS-KEY ( compensat* ) ) OR ( TITLE-ABS-KEY ( incentive* ) ) OR ( TITLE-ABS-KEY ( financ* ) ) OR ( TITLE-ABS-KEY ( reimburs* ) ) OR ( TITLE-ABS-KEY ( purchas* ) ) OR ( TITLE-ABS-KEY ( reward* ) ) OR ( TITLE-ABS-KEY ( bonus* ) )) AND (( TITLE-ABS-KEY ( reform* ) ) OR ( TITLE-ABS-KEY ( polic* ) ) OR ( TITLE-ABS-KEY ( chang* ) )) AND (( TITLE-ABS-KEY ( "healthcare provider*" ) ) OR ( TITLE-ABS-KEY ( "care provider*" ) ) OR ( TITLE-ABS-KEY ( "health provider*" ) ) OR ( TITLE-ABS-KEY ( "health service provider*" ) ) OR ( TITLE-ABS-KEY ( "health practice*" ) ) OR ( TITLE-ABS-KEY ( "healthcare practice*" ) ) OR ( TITLE-ABS-KEY ( "medical practice*" ) ) OR ( TITLE-ABS-KEY ( "health institution*" ) ) OR ( TITLE-ABS-KEY ( "healthcare institution*" ) ) OR ( TITLE-ABS-KEY ( "health care institution*" ) )) AND (( TITLE-ABS-KEY ( factor* ) ) OR ( TITLE-ABS-KEY ( barrier* ) ) OR ( TITLE-ABS-KEY ( obstacle* ) ) OR ( TITLE-ABS-KEY ( hurdle* ) ) OR ( TITLE-ABS-KEY ( imped* ) ) OR ( TITLE-ABS-KEY ( difficult* ) ) OR ( TITLE-ABS-KEY ( challenge* ) ) OR ( TITLE-ABS-KEY ( facilitat* ) ) OR ( TITLE-ABS-KEY ( promot* ) ) OR ( TITLE-ABS-KEY ( aid* ) ) OR ( TITLE-ABS-KEY ( enabl* ) ) OR ( TITLE-ABS-KEY ( help* ) ) OR ( TITLE-ABS-KEY ( reason* ) ) OR ( TITLE-ABS-KEY ( experienc* ) ) OR ( TITLE-ABS-KEY ( perception* ) ) OR ( TITLE-ABS-KEY ( determinant* ) ) OR ( TITLE-ABS-KEY ( influenc* ) ) OR ( TITLE-ABS-KEY ( constraint* ) ) OR ( TITLE-ABS-KEY ( issue* ) ))                                                                                                                                                                                                                                                                                                                                                                                                                                                                                                                                                                                                                                                                                                                                                                                                                                                          |

|     |                                                                                                                                                                                                                                                                                                                                                                                                                                                                                                                                                                                                                                                                       |
|-----|-----------------------------------------------------------------------------------------------------------------------------------------------------------------------------------------------------------------------------------------------------------------------------------------------------------------------------------------------------------------------------------------------------------------------------------------------------------------------------------------------------------------------------------------------------------------------------------------------------------------------------------------------------------------------|
| #44 | ( TITLE-ABS-KEY ( reform* ) ) OR ( TITLE-ABS-KEY ( polic* ) ) OR ( TITLE-ABS-KEY ( chang* ) )                                                                                                                                                                                                                                                                                                                                                                                                                                                                                                                                                                         |
| #43 | TITLE-ABS-KEY ( chang* )                                                                                                                                                                                                                                                                                                                                                                                                                                                                                                                                                                                                                                              |
| #42 | TITLE-ABS-KEY ( polic* )                                                                                                                                                                                                                                                                                                                                                                                                                                                                                                                                                                                                                                              |
| #41 | TITLE-ABS-KEY ( reform* )                                                                                                                                                                                                                                                                                                                                                                                                                                                                                                                                                                                                                                             |
| #40 | ( TITLE-ABS-KEY ( pay* ) ) OR ( TITLE-ABS-KEY ( compensat* ) ) OR ( TITLE-ABS-KEY ( incentive* ) ) OR ( TITLE-ABS-KEY ( financ* ) ) OR ( TITLE-ABS-KEY ( reimburs* ) ) OR ( TITLE-ABS-KEY ( purchas* ) ) OR ( TITLE-ABS-KEY ( reward* ) ) OR ( TITLE-ABS-KEY ( bonus* ) )                                                                                                                                                                                                                                                                                                                                                                                             |
| #39 | TITLE-ABS-KEY ( bonus* )                                                                                                                                                                                                                                                                                                                                                                                                                                                                                                                                                                                                                                              |
| #38 | TITLE-ABS-KEY ( reward* )                                                                                                                                                                                                                                                                                                                                                                                                                                                                                                                                                                                                                                             |
| #37 | TITLE-ABS-KEY ( purchas* )                                                                                                                                                                                                                                                                                                                                                                                                                                                                                                                                                                                                                                            |
| #36 | TITLE-ABS-KEY ( reimburs* )                                                                                                                                                                                                                                                                                                                                                                                                                                                                                                                                                                                                                                           |
| #35 | TITLE-ABS-KEY ( financ* )                                                                                                                                                                                                                                                                                                                                                                                                                                                                                                                                                                                                                                             |
| #34 | TITLE-ABS-KEY ( incentive* )                                                                                                                                                                                                                                                                                                                                                                                                                                                                                                                                                                                                                                          |
| #33 | TITLE-ABS-KEY ( compensat* )                                                                                                                                                                                                                                                                                                                                                                                                                                                                                                                                                                                                                                          |
| #32 | TITLE-ABS-KEY ( pay* )                                                                                                                                                                                                                                                                                                                                                                                                                                                                                                                                                                                                                                                |
| #31 | ( TITLE-ABS-KEY ( "healthcare provider*" ) ) OR ( TITLE-ABS-KEY ( "care provider*" ) ) OR ( TITLE-ABS-KEY ( "health provider*" ) ) OR ( TITLE-ABS-KEY ( "health service provider*" ) ) OR ( TITLE-ABS-KEY ( "health practice*" ) ) OR ( TITLE-ABS-KEY ( "healthcare practice*" ) ) OR ( TITLE-ABS-KEY ( "medical practice*" ) ) OR ( TITLE-ABS-KEY ( "health institution*" ) ) OR ( TITLE-ABS-KEY ( "healthcare institution*" ) ) OR ( TITLE-ABS-KEY ( "health care institution*" ) )                                                                                                                                                                                 |
| #30 | TITLE-ABS-KEY ( "health care institution*" )                                                                                                                                                                                                                                                                                                                                                                                                                                                                                                                                                                                                                          |
| #29 | TITLE-ABS-KEY ( "healthcare institution*" )                                                                                                                                                                                                                                                                                                                                                                                                                                                                                                                                                                                                                           |
| #28 | TITLE-ABS-KEY ( "health institution*" )                                                                                                                                                                                                                                                                                                                                                                                                                                                                                                                                                                                                                               |
| #27 | TITLE-ABS-KEY ( "medical practice*" )                                                                                                                                                                                                                                                                                                                                                                                                                                                                                                                                                                                                                                 |
| #26 | TITLE-ABS-KEY ( "healthcare practice*" )                                                                                                                                                                                                                                                                                                                                                                                                                                                                                                                                                                                                                              |
| #25 | TITLE-ABS-KEY ( "health practice*" )                                                                                                                                                                                                                                                                                                                                                                                                                                                                                                                                                                                                                                  |
| #24 | TITLE-ABS-KEY ( "health service provider*" )                                                                                                                                                                                                                                                                                                                                                                                                                                                                                                                                                                                                                          |
| #23 | TITLE-ABS-KEY ( "health provider*" )                                                                                                                                                                                                                                                                                                                                                                                                                                                                                                                                                                                                                                  |
| #22 | TITLE-ABS-KEY ( "care provider*" )                                                                                                                                                                                                                                                                                                                                                                                                                                                                                                                                                                                                                                    |
| #21 | TITLE-ABS-KEY ( "healthcare provider*" )                                                                                                                                                                                                                                                                                                                                                                                                                                                                                                                                                                                                                              |
| #20 | ( TITLE-ABS-KEY ( factor* ) ) OR ( TITLE-ABS-KEY ( barrier* ) ) OR ( TITLE-ABS-KEY ( obstacle* ) ) OR ( TITLE-ABS-KEY ( hurdle* ) ) OR ( TITLE-ABS-KEY ( imped* ) ) OR ( TITLE-ABS-KEY ( difficult* ) ) OR ( TITLE-ABS-KEY ( challenge* ) ) OR ( TITLE-ABS-KEY ( facilitat* ) ) OR ( TITLE-ABS-KEY ( promot* ) ) OR ( TITLE-ABS-KEY ( aid* ) ) OR ( TITLE-ABS-KEY ( enabl* ) ) OR ( TITLE-ABS-KEY ( help* ) ) OR ( TITLE-ABS-KEY ( reason* ) ) OR ( TITLE-ABS-KEY ( experienc* ) ) OR ( TITLE-ABS-KEY ( perception* ) ) OR ( TITLE-ABS-KEY ( determinant* ) ) OR ( TITLE-ABS-KEY ( influenc* ) ) OR ( TITLE-ABS-KEY ( constraint* ) ) OR ( TITLE-ABS-KEY ( issue* ) ) |
| #19 | TITLE-ABS-KEY ( issue* )                                                                                                                                                                                                                                                                                                                                                                                                                                                                                                                                                                                                                                              |
| #18 | TITLE-ABS-KEY ( constraint* )                                                                                                                                                                                                                                                                                                                                                                                                                                                                                                                                                                                                                                         |
| #17 | TITLE-ABS-KEY ( influenc* )                                                                                                                                                                                                                                                                                                                                                                                                                                                                                                                                                                                                                                           |
| #16 | TITLE-ABS-KEY ( determinant* )                                                                                                                                                                                                                                                                                                                                                                                                                                                                                                                                                                                                                                        |
| #15 | TITLE-ABS-KEY ( perception* )                                                                                                                                                                                                                                                                                                                                                                                                                                                                                                                                                                                                                                         |
| #14 | TITLE-ABS-KEY ( experienc* )                                                                                                                                                                                                                                                                                                                                                                                                                                                                                                                                                                                                                                          |
| #13 | TITLE-ABS-KEY ( reason* )                                                                                                                                                                                                                                                                                                                                                                                                                                                                                                                                                                                                                                             |
| #12 | TITLE-ABS-KEY ( help* )                                                                                                                                                                                                                                                                                                                                                                                                                                                                                                                                                                                                                                               |
| #11 | TITLE-ABS-KEY ( enabl* )                                                                                                                                                                                                                                                                                                                                                                                                                                                                                                                                                                                                                                              |
| #10 | TITLE-ABS-KEY ( aid* )                                                                                                                                                                                                                                                                                                                                                                                                                                                                                                                                                                                                                                                |
| #9  | TITLE-ABS-KEY ( promot* )                                                                                                                                                                                                                                                                                                                                                                                                                                                                                                                                                                                                                                             |
| #8  | TITLE-ABS-KEY ( facilitat* )                                                                                                                                                                                                                                                                                                                                                                                                                                                                                                                                                                                                                                          |
| #7  | TITLE-ABS-KEY ( challenge* )                                                                                                                                                                                                                                                                                                                                                                                                                                                                                                                                                                                                                                          |
| #6  | TITLE-ABS-KEY ( difficult* )                                                                                                                                                                                                                                                                                                                                                                                                                                                                                                                                                                                                                                          |
| #5  | TITLE-ABS-KEY ( imped* )                                                                                                                                                                                                                                                                                                                                                                                                                                                                                                                                                                                                                                              |
| #4  | TITLE-ABS-KEY ( hurdle* )                                                                                                                                                                                                                                                                                                                                                                                                                                                                                                                                                                                                                                             |
| #3  | TITLE-ABS-KEY ( obstacle* )                                                                                                                                                                                                                                                                                                                                                                                                                                                                                                                                                                                                                                           |
| #2  | TITLE-ABS-KEY ( barrier* )                                                                                                                                                                                                                                                                                                                                                                                                                                                                                                                                                                                                                                            |
| #1  | TITLE-ABS-KEY ( factor* )                                                                                                                                                                                                                                                                                                                                                                                                                                                                                                                                                                                                                                             |

**Table S2. Search strategy in Web of Science**

Date of search: 08/11/2022

| Set | Query                                                                                                                                                                                                                                                                                                                                                       |
|-----|-------------------------------------------------------------------------------------------------------------------------------------------------------------------------------------------------------------------------------------------------------------------------------------------------------------------------------------------------------------|
| #46 | #44 AND #40 AND #31 AND #20 and Article or Review Article or Book Chapters ( <b>Document Types</b> ) and 2022 or 2021 or 2020 or 2019 or 2018 or 2017 or 2016 or 2015 or 2014 or 2013 or 2012 or 2011 or 2010 or 2009 or 2008 or 2007 or 2006 or 2005 or 2004 or 2002 or 2003 or 2001 or 2000 ( <b>Publication Years</b> ) and English ( <b>Languages</b> ) |
| #45 | #44 AND #40 AND #31 AND #20                                                                                                                                                                                                                                                                                                                                 |
| #44 | #41 OR #42 OR #43                                                                                                                                                                                                                                                                                                                                           |
| #43 | (TI=(chang*)) OR AB=(chang*)                                                                                                                                                                                                                                                                                                                                |
| #42 | (TI=(polic*)) OR AB=(polic*)                                                                                                                                                                                                                                                                                                                                |
| #41 | (TI=(reform*)) OR AB=(reform*)                                                                                                                                                                                                                                                                                                                              |
| #40 | #32 OR #33 OR #34 OR #35 OR #36 OR #37 OR #38 OR #39                                                                                                                                                                                                                                                                                                        |
| #39 | (TI=(bonus*)) OR AB=(bonus*)                                                                                                                                                                                                                                                                                                                                |
| #38 | (TI=(reward*)) OR AB=(reward*)                                                                                                                                                                                                                                                                                                                              |
| #37 | (TI=(purchas* )) OR AB=(purchas* )                                                                                                                                                                                                                                                                                                                          |
| #36 | (TI=(reimburs*)) OR AB=(reimburs*)                                                                                                                                                                                                                                                                                                                          |
| #35 | (TI=(financ*)) OR AB=(financ*)                                                                                                                                                                                                                                                                                                                              |
| #34 | (TI=(incentive*)) OR AB=(incentive*)                                                                                                                                                                                                                                                                                                                        |
| #33 | (TI=(compensat*)) OR AB=(compensat*)                                                                                                                                                                                                                                                                                                                        |
| #32 | (TI=(pay*)) OR AB=(pay*)                                                                                                                                                                                                                                                                                                                                    |
| #31 | #21 OR #22 OR #23 OR #24 OR #25 OR #26 OR #27 OR #28 OR #29 OR #30                                                                                                                                                                                                                                                                                          |
| #30 | (TI=("health care institution**")) OR AB=("health care institution**")                                                                                                                                                                                                                                                                                      |
| #29 | (TI=("healthcare institution** ")) OR AB=("healthcare institution** ")                                                                                                                                                                                                                                                                                      |
| #28 | (TI=("health institution** ")) OR AB=("health institution** ")                                                                                                                                                                                                                                                                                              |
| #27 | (TI=("medical practice** ")) OR AB=("medical practice** ")                                                                                                                                                                                                                                                                                                  |
| #26 | (TI=("healthcare practice** ")) OR AB=("healthcare practice** ")                                                                                                                                                                                                                                                                                            |
| #25 | (TI=("health practice** ")) OR AB=("health practice** ")                                                                                                                                                                                                                                                                                                    |
| #24 | (TI=("health service provider** ")) OR AB=("health service provider** ")                                                                                                                                                                                                                                                                                    |
| #23 | (TI=("health provider** ")) OR AB=("health provider** ")                                                                                                                                                                                                                                                                                                    |
| #22 | (TI=("care provider** ")) OR AB=("care provider** ")                                                                                                                                                                                                                                                                                                        |
| #21 | (TI=("healthcare provider** ")) OR AB=("healthcare provider** ")                                                                                                                                                                                                                                                                                            |
| #20 | #1 OR #2 OR #3 OR #4 OR #5 OR #6 OR #7 OR #8 OR #9 OR #10 OR #11 OR #12 OR #13 OR #14 OR #15 OR #16 OR #17 OR #18 OR #19                                                                                                                                                                                                                                    |
| #19 | (TI=(issue*)) OR AB=(issue*)                                                                                                                                                                                                                                                                                                                                |
| #18 | (TI=(constraint*)) OR AB=(constraint*)                                                                                                                                                                                                                                                                                                                      |
| #17 | (TI=(influenc* )) OR AB=(influenc* )                                                                                                                                                                                                                                                                                                                        |
| #16 | (TI=(determinant* )) OR AB=(determinant* )                                                                                                                                                                                                                                                                                                                  |
| #15 | (TI=(perception*)) OR AB=(perception*)                                                                                                                                                                                                                                                                                                                      |
| #14 | (TI=(experienc*)) OR AB=(experienc*)                                                                                                                                                                                                                                                                                                                        |
| #13 | (TI=(reason*)) OR AB=(reason*)                                                                                                                                                                                                                                                                                                                              |
| #12 | (TI=(help*)) OR AB=(help*)                                                                                                                                                                                                                                                                                                                                  |
| #11 | (TI=(enabl*)) OR AB=(enabl*)                                                                                                                                                                                                                                                                                                                                |
| #10 | (TI=(aid*)) OR AB=(aid*)                                                                                                                                                                                                                                                                                                                                    |
| #9  | (TI=(promot*)) OR AB=(promot*)                                                                                                                                                                                                                                                                                                                              |
| #8  | (TI=(facilitat*)) OR AB=(facilitat*)                                                                                                                                                                                                                                                                                                                        |
| #7  | (TI=(challenge*)) OR AB=(challenge*)                                                                                                                                                                                                                                                                                                                        |
| #6  | (TI=(difficult*)) OR AB=(difficult*)                                                                                                                                                                                                                                                                                                                        |
| #5  | (TI=(imped*)) OR AB=(imped*)                                                                                                                                                                                                                                                                                                                                |
| #4  | (TI=(hurdle*)) OR AB=(hurdle*)                                                                                                                                                                                                                                                                                                                              |
| #3  | (TI=(obstacle*)) OR AB=(obstacle*)                                                                                                                                                                                                                                                                                                                          |
| #2  | (TI=(barrier*)) OR AB=(barrier*)                                                                                                                                                                                                                                                                                                                            |
| #1  | (TI=(factor* )) OR AB=(factor* )                                                                                                                                                                                                                                                                                                                            |

**Table S3. Search strategy in PubMed**  
Date of search: 08/11/2022

| Set | Query                                                                                                                                                                                                                                                                                                                                                                                                                                                                                                                                                                                                                                                                                                                                                                                                                                                                                                                                                                                                                                                                                                                                                                                                                                                                                                                                                                                                                                                                                      |
|-----|--------------------------------------------------------------------------------------------------------------------------------------------------------------------------------------------------------------------------------------------------------------------------------------------------------------------------------------------------------------------------------------------------------------------------------------------------------------------------------------------------------------------------------------------------------------------------------------------------------------------------------------------------------------------------------------------------------------------------------------------------------------------------------------------------------------------------------------------------------------------------------------------------------------------------------------------------------------------------------------------------------------------------------------------------------------------------------------------------------------------------------------------------------------------------------------------------------------------------------------------------------------------------------------------------------------------------------------------------------------------------------------------------------------------------------------------------------------------------------------------|
| #46 | ((((((((((((((((((((((factor*[Title/Abstract]) OR (barrier*[Title/Abstract])) OR (obstacle*[Title/Abstract])) OR (hurdle*[Title/Abstract])) OR (imped*[Title/Abstract])) OR (difficult*[Title/Abstract])) OR (challenge*[Title/Abstract])) OR (facilitat*[Title/Abstract])) OR (promot*[Title/Abstract])) OR (aid*[Title/Abstract])) OR (enabl*[Title/Abstract])) OR (help*[Title/Abstract])) OR (reason*[Title/Abstract])) OR (experienc*[Title/Abstract])) OR (perception*[Title/Abstract])) OR (determinant*[Title/Abstract])) OR (influenc*[Title/Abstract])) OR (constraint*[Title/Abstract])) OR (issue*[Title/Abstract])) AND (((((((("healthcare provider"*[Title/Abstract]) OR ("care provider"*[Title/Abstract])) OR ("health provider"*[Title/Abstract])) OR ("health service provider"*[Title/Abstract])) OR ("health practice"*[Title/Abstract])) OR ("healthcare practice"*[Title/Abstract])) OR ("medical practice"*[Title/Abstract])) OR ("health institution"*[Title/Abstract])) OR ("healthcare institution"*[Title/Abstract])) OR ("health care institution"*[Title/Abstract])) AND (((((((pay*[Title/Abstract]) OR (compensat*[Title/Abstract])) OR (incentive*[Title/Abstract])) OR (financ*[Title/Abstract])) OR (reimburs*[Title/Abstract])) OR (purchas*[Title/Abstract])) OR (reward*[Title/Abstract])) OR (bonus*[Title/Abstract])) AND (((reform*[Title/Abstract]) OR (polic*[Title/Abstract])) OR (chang*[Title/Abstract])) Filters: English, from 2000 - 2022 |
| #45 | ((((((((((((((((((((((factor*[Title/Abstract]) OR (barrier*[Title/Abstract])) OR (obstacle*[Title/Abstract])) OR (hurdle*[Title/Abstract])) OR (imped*[Title/Abstract])) OR (difficult*[Title/Abstract])) OR (challenge*[Title/Abstract])) OR (facilitat*[Title/Abstract])) OR (promot*[Title/Abstract])) OR (aid*[Title/Abstract])) OR (enabl*[Title/Abstract])) OR (help*[Title/Abstract])) OR (reason*[Title/Abstract])) OR (experienc*[Title/Abstract])) OR (perception*[Title/Abstract])) OR (determinant*[Title/Abstract])) OR (influenc*[Title/Abstract])) OR (constraint*[Title/Abstract])) OR (issue*[Title/Abstract])) AND (((((((("healthcare provider"*[Title/Abstract]) OR ("care provider"*[Title/Abstract])) OR ("health provider"*[Title/Abstract])) OR ("health service provider"*[Title/Abstract])) OR ("health practice"*[Title/Abstract])) OR ("healthcare practice"*[Title/Abstract])) OR ("medical practice"*[Title/Abstract])) OR ("health institution"*[Title/Abstract])) OR ("healthcare institution"*[Title/Abstract])) OR ("health care institution"*[Title/Abstract])) AND (((((((pay*[Title/Abstract]) OR (compensat*[Title/Abstract])) OR (incentive*[Title/Abstract])) OR (financ*[Title/Abstract])) OR (reimburs*[Title/Abstract])) OR (purchas*[Title/Abstract])) OR (reward*[Title/Abstract])) OR (bonus*[Title/Abstract])) AND (((reform*[Title/Abstract]) OR (polic*[Title/Abstract])) OR (chang*[Title/Abstract]))                                    |
| #44 | ((reform*[Title/Abstract]) OR (polic*[Title/Abstract])) OR (chang*[Title/Abstract])                                                                                                                                                                                                                                                                                                                                                                                                                                                                                                                                                                                                                                                                                                                                                                                                                                                                                                                                                                                                                                                                                                                                                                                                                                                                                                                                                                                                        |
| #43 | chang*[Title/Abstract]                                                                                                                                                                                                                                                                                                                                                                                                                                                                                                                                                                                                                                                                                                                                                                                                                                                                                                                                                                                                                                                                                                                                                                                                                                                                                                                                                                                                                                                                     |
| #42 | polic*[Title/Abstract]                                                                                                                                                                                                                                                                                                                                                                                                                                                                                                                                                                                                                                                                                                                                                                                                                                                                                                                                                                                                                                                                                                                                                                                                                                                                                                                                                                                                                                                                     |
| #41 | reform*[Title/Abstract]                                                                                                                                                                                                                                                                                                                                                                                                                                                                                                                                                                                                                                                                                                                                                                                                                                                                                                                                                                                                                                                                                                                                                                                                                                                                                                                                                                                                                                                                    |
| #40 | ((((((pay*[Title/Abstract]) OR (compensat*[Title/Abstract])) OR (incentive*[Title/Abstract])) OR (financ*[Title/Abstract])) OR (reimburs*[Title/Abstract])) OR (purchas*[Title/Abstract])) OR (reward*[Title/Abstract])) OR (bonus*[Title/Abstract])                                                                                                                                                                                                                                                                                                                                                                                                                                                                                                                                                                                                                                                                                                                                                                                                                                                                                                                                                                                                                                                                                                                                                                                                                                       |
| #39 | bonus*[Title/Abstract]                                                                                                                                                                                                                                                                                                                                                                                                                                                                                                                                                                                                                                                                                                                                                                                                                                                                                                                                                                                                                                                                                                                                                                                                                                                                                                                                                                                                                                                                     |
| #38 | reward*[Title/Abstract]                                                                                                                                                                                                                                                                                                                                                                                                                                                                                                                                                                                                                                                                                                                                                                                                                                                                                                                                                                                                                                                                                                                                                                                                                                                                                                                                                                                                                                                                    |
| #37 | purchas*[Title/Abstract]                                                                                                                                                                                                                                                                                                                                                                                                                                                                                                                                                                                                                                                                                                                                                                                                                                                                                                                                                                                                                                                                                                                                                                                                                                                                                                                                                                                                                                                                   |
| #36 | reimburs*[Title/Abstract]                                                                                                                                                                                                                                                                                                                                                                                                                                                                                                                                                                                                                                                                                                                                                                                                                                                                                                                                                                                                                                                                                                                                                                                                                                                                                                                                                                                                                                                                  |
| #35 | financ*[Title/Abstract]                                                                                                                                                                                                                                                                                                                                                                                                                                                                                                                                                                                                                                                                                                                                                                                                                                                                                                                                                                                                                                                                                                                                                                                                                                                                                                                                                                                                                                                                    |
| #34 | incentive*[Title/Abstract]                                                                                                                                                                                                                                                                                                                                                                                                                                                                                                                                                                                                                                                                                                                                                                                                                                                                                                                                                                                                                                                                                                                                                                                                                                                                                                                                                                                                                                                                 |
| #33 | compensat*[Title/Abstract]                                                                                                                                                                                                                                                                                                                                                                                                                                                                                                                                                                                                                                                                                                                                                                                                                                                                                                                                                                                                                                                                                                                                                                                                                                                                                                                                                                                                                                                                 |
| #32 | pay*[Title/Abstract]                                                                                                                                                                                                                                                                                                                                                                                                                                                                                                                                                                                                                                                                                                                                                                                                                                                                                                                                                                                                                                                                                                                                                                                                                                                                                                                                                                                                                                                                       |
| #31 | ((((((("healthcare provider"*[Title/Abstract]) OR ("care provider"*[Title/Abstract])) OR ("health provider"*[Title/Abstract])) OR ("health service provider"*[Title/Abstract])) OR ("health practice"*[Title/Abstract])) OR ("healthcare practice"*[Title/Abstract])) OR ("medical practice"*[Title/Abstract])) OR ("health institution"*[Title/Abstract])) OR ("healthcare institution"*[Title/Abstract])) OR ("health care institution"*[Title/Abstract])                                                                                                                                                                                                                                                                                                                                                                                                                                                                                                                                                                                                                                                                                                                                                                                                                                                                                                                                                                                                                                |
| #30 | "health care institution"*[Title/Abstract]                                                                                                                                                                                                                                                                                                                                                                                                                                                                                                                                                                                                                                                                                                                                                                                                                                                                                                                                                                                                                                                                                                                                                                                                                                                                                                                                                                                                                                                 |
| #29 | "healthcare institution"*[Title/Abstract]                                                                                                                                                                                                                                                                                                                                                                                                                                                                                                                                                                                                                                                                                                                                                                                                                                                                                                                                                                                                                                                                                                                                                                                                                                                                                                                                                                                                                                                  |
| #28 | "health institution"*[Title/Abstract]                                                                                                                                                                                                                                                                                                                                                                                                                                                                                                                                                                                                                                                                                                                                                                                                                                                                                                                                                                                                                                                                                                                                                                                                                                                                                                                                                                                                                                                      |
| #27 | "medical practice"*[Title/Abstract]                                                                                                                                                                                                                                                                                                                                                                                                                                                                                                                                                                                                                                                                                                                                                                                                                                                                                                                                                                                                                                                                                                                                                                                                                                                                                                                                                                                                                                                        |
| #26 | "healthcare practice"*[Title/Abstract]                                                                                                                                                                                                                                                                                                                                                                                                                                                                                                                                                                                                                                                                                                                                                                                                                                                                                                                                                                                                                                                                                                                                                                                                                                                                                                                                                                                                                                                     |
| #25 | "health practice"*[Title/Abstract]                                                                                                                                                                                                                                                                                                                                                                                                                                                                                                                                                                                                                                                                                                                                                                                                                                                                                                                                                                                                                                                                                                                                                                                                                                                                                                                                                                                                                                                         |

|     |                                                                                                                                                                                                                                                                                                                                                                                                                                                                                                                                                                                                                |
|-----|----------------------------------------------------------------------------------------------------------------------------------------------------------------------------------------------------------------------------------------------------------------------------------------------------------------------------------------------------------------------------------------------------------------------------------------------------------------------------------------------------------------------------------------------------------------------------------------------------------------|
| #24 | "health service provider*"[Title/Abstract]                                                                                                                                                                                                                                                                                                                                                                                                                                                                                                                                                                     |
| #23 | "health provider*"[Title/Abstract]                                                                                                                                                                                                                                                                                                                                                                                                                                                                                                                                                                             |
| #22 | "care provider*"[Title/Abstract]                                                                                                                                                                                                                                                                                                                                                                                                                                                                                                                                                                               |
| #21 | "healthcare provider*"[Title/Abstract]                                                                                                                                                                                                                                                                                                                                                                                                                                                                                                                                                                         |
| #20 | (((((factor*[Title/Abstract]) OR (barrier*[Title/Abstract])) OR (obstacle*[Title/Abstract])) OR (hurdle*[Title/Abstract])) OR (imped*[Title/Abstract])) OR (difficult*[Title/Abstract])) OR (challenge*[Title/Abstract])) OR (facilitat*[Title/Abstract])) OR (promot*[Title/Abstract])) OR (aid*[Title/Abstract])) OR (enabl*[Title/Abstract])) OR (help*[Title/Abstract])) OR (reason*[Title/Abstract])) OR (experienc*[Title/Abstract])) OR (perception*[Title/Abstract])) OR (determinant*[Title/Abstract])) OR (influenc*[Title/Abstract])) OR (constraint*[Title/Abstract])) OR (issue*[Title/Abstract]) |
| #19 | issue*[Title/Abstract]                                                                                                                                                                                                                                                                                                                                                                                                                                                                                                                                                                                         |
| #18 | constraint*[Title/Abstract]                                                                                                                                                                                                                                                                                                                                                                                                                                                                                                                                                                                    |
| #17 | influenc*[Title/Abstract]                                                                                                                                                                                                                                                                                                                                                                                                                                                                                                                                                                                      |
| #16 | determinant*[Title/Abstract]                                                                                                                                                                                                                                                                                                                                                                                                                                                                                                                                                                                   |
| #15 | perception*[Title/Abstract]                                                                                                                                                                                                                                                                                                                                                                                                                                                                                                                                                                                    |
| #14 | experienc*[Title/Abstract]                                                                                                                                                                                                                                                                                                                                                                                                                                                                                                                                                                                     |
| #13 | reason*[Title/Abstract]                                                                                                                                                                                                                                                                                                                                                                                                                                                                                                                                                                                        |
| #12 | help*[Title/Abstract]                                                                                                                                                                                                                                                                                                                                                                                                                                                                                                                                                                                          |
| #11 | enabl*[Title/Abstract]                                                                                                                                                                                                                                                                                                                                                                                                                                                                                                                                                                                         |
| #10 | aid*[Title/Abstract]                                                                                                                                                                                                                                                                                                                                                                                                                                                                                                                                                                                           |
| #9  | promot*[Title/Abstract]                                                                                                                                                                                                                                                                                                                                                                                                                                                                                                                                                                                        |
| #8  | facilitat*[Title/Abstract]                                                                                                                                                                                                                                                                                                                                                                                                                                                                                                                                                                                     |
| #7  | challenge*[Title/Abstract]                                                                                                                                                                                                                                                                                                                                                                                                                                                                                                                                                                                     |
| #6  | difficult*[Title/Abstract]                                                                                                                                                                                                                                                                                                                                                                                                                                                                                                                                                                                     |
| #5  | imped*[Title/Abstract]                                                                                                                                                                                                                                                                                                                                                                                                                                                                                                                                                                                         |
| #4  | hurdle*[Title/Abstract]                                                                                                                                                                                                                                                                                                                                                                                                                                                                                                                                                                                        |
| #3  | obstacle*[Title/Abstract]                                                                                                                                                                                                                                                                                                                                                                                                                                                                                                                                                                                      |
| #2  | barrier*[Title/Abstract]                                                                                                                                                                                                                                                                                                                                                                                                                                                                                                                                                                                       |
| #1  | factor*[Title/Abstract]                                                                                                                                                                                                                                                                                                                                                                                                                                                                                                                                                                                        |

**Table S4.** Search strategy in Business Source Complete (EBSCO)  
Search date: 16/11/2022

| Search ID# | Search Terms                                                                                                                                                                                                                                                                                                                                                     |
|------------|------------------------------------------------------------------------------------------------------------------------------------------------------------------------------------------------------------------------------------------------------------------------------------------------------------------------------------------------------------------|
| # S46      | <p><i>Limiters</i></p> <ul style="list-style-type: none"> <li>• Full Text</li> <li>• Date Published: 2000-2022</li> </ul> <p><i>Source Types</i></p> <ul style="list-style-type: none"> <li>• Academic Journals</li> <li>• Reports</li> <li>• Dissertations</li> </ul> <p><i>Language</i></p> <ul style="list-style-type: none"> <li>• <u>english</u></li> </ul> |
| # S45      | S20 AND S31 AND S40 AND S44                                                                                                                                                                                                                                                                                                                                      |
| # S44      | S41 OR S42 OR S43                                                                                                                                                                                                                                                                                                                                                |
| # S43      | TI chang* OR AB chang*                                                                                                                                                                                                                                                                                                                                           |
| # S42      | TI polic* OR AB polic*                                                                                                                                                                                                                                                                                                                                           |
| # S41      | TI reform* OR AB reform*                                                                                                                                                                                                                                                                                                                                         |
| # S40      | S32 OR S33 OR S34 OR S35 OR S36 OR S37 OR S38 OR S39                                                                                                                                                                                                                                                                                                             |
| # S39      | TI bonus* OR AB bonus*                                                                                                                                                                                                                                                                                                                                           |
| # S38      | TI reward* OR AB reward*                                                                                                                                                                                                                                                                                                                                         |
| # S37      | TI purchas* OR AB purchas*                                                                                                                                                                                                                                                                                                                                       |
| # S36      | TI reimburs* OR AB reimburs*                                                                                                                                                                                                                                                                                                                                     |
| # S35      | TI financ* OR AB financ*                                                                                                                                                                                                                                                                                                                                         |
| # S34      | TI incentive* OR AB incentive*                                                                                                                                                                                                                                                                                                                                   |

|       |                                                                                                                          |
|-------|--------------------------------------------------------------------------------------------------------------------------|
| # S33 | TI compensat* OR AB compensat*                                                                                           |
| # S32 | TI pay* OR AB pay*                                                                                                       |
| # S31 | S21 OR S22 OR S23 OR S24 OR S25 OR S26 OR S27 OR S28 OR S29 OR S30                                                       |
| # S30 | TI "health care institution*" OR AB "health care institution"                                                            |
| # S29 | TI "healthcare institution*" OR AB "healthcare institution"                                                              |
| # S28 | TI "health institution*" OR AB "health institution"                                                                      |
| # S27 | TI "medical practice*" OR AB "medical practice"                                                                          |
| # S26 | TI "healthcare practice*" OR AB "healthcare practice"                                                                    |
| # S25 | TI "health practice*" OR AB "health practice"                                                                            |
| # S24 | TI "health service provider*" OR AB "health service provider"                                                            |
| # S23 | TI "health provider*" OR AB "health provider"                                                                            |
| # S22 | TI "care provider*" OR AB "care provider"                                                                                |
| # S21 | TI "healthcare provider*" OR AB "healthcare provider"                                                                    |
| # S20 | S1 OR S2 OR S3 OR S4 OR S5 OR S6 OR S7 OR S8 OR S9 OR S10 OR S11 OR S12 OR S13 OR S14 OR S15 OR S16 OR S17 OR S18 OR S19 |
| # S19 | TI issue* OR AB issue*                                                                                                   |
| # S18 | TI constraint* OR AB constraint*                                                                                         |
| # S17 | TI influenc* OR AB influenc*                                                                                             |
| # S16 | TI determinant* OR AB determinant*                                                                                       |
| # S15 | TI perception* OR AB perception*                                                                                         |
| # S14 | TI experienc* OR AB experienc*                                                                                           |
| # S13 | TI reason* OR AB reason*                                                                                                 |
| # S12 | TI help* OR AB help*                                                                                                     |
| # S11 | TI enabl* OR AB enabl*                                                                                                   |
| # S10 | TI aid* OR AB aid*                                                                                                       |
| # S9  | TI promot* OR AB promot*                                                                                                 |
| # S8  | TI facilitat* OR AB facilitat*                                                                                           |
| # S7  | TI challenge* OR AB challenge*                                                                                           |
| # S6  | TI difficult* OR AB difficult*                                                                                           |
| # S5  | TI imped* OR AB imped*                                                                                                   |
| # S4  | TI hurdle* OR AB hurdle*                                                                                                 |
| # S3  | TI obstacle* OR AB obstacle*                                                                                             |
| # S2  | TI barrier* OR AB barrier*                                                                                               |
| # S1  | TI factor* OR AB factor*                                                                                                 |

**Table S5. Google Engine Search**  
Date of search: 14/11/2022

i) Procedure:

Similar to scientific databases, we searched Google Engine using terms from the four core concepts listed in Table 1. However, Google Engine limits the search queries to 32 words. We used the most appropriate keywords and combined some of them. Exceptionally, Google Engine does not index publications by abstract. Therefore, the command was adapted to search for the terms in the "title" or in the "text". The corresponding commands were also applied: |= OR, &= AND. Since Google Engine can index files in different formats, we also added a command to limit the file types to those that are common in scientific formats and that can be imported into our citation manager (Mendeley). The file types were limited to (.pdf) and TeX/LaTeX (.tex). The latter did not occur in any document found and was therefore removed from the query.

The final search query is as follows:

***intitle | intext:factor | barrier | obstacle | hurdle | imped | difficult | challenge | facilitator | promote | aid | enable | help | experience | perception | determinant | influence | constraint | issue & "care provider" | "healthcare provider\*" | "health provider" & "payment reform" | "reimbursement reform" | "remuneration reform" filetype:pdf***

ii) Search results:

We allowed Google Engine to omit entries that were very similar to the results already displayed. As a result, the most relevant results were displayed: 145 publications on 14 pages. They were all taken into account.

**Table S6.** List of manually searched organizations

| Organization name                                                         | Website/Link                                                                                | Date of search |
|---------------------------------------------------------------------------|---------------------------------------------------------------------------------------------|----------------|
| Center for healthcare quality and payment reform (CHQPR)                  | <a href="https://chqpr.org/">https://chqpr.org/</a>                                         | 24/01/2023     |
| OECD                                                                      | <a href="https://www.oecd.org/index.htm">https://www.oecd.org/index.htm</a>                 | 24/01/2023     |
| WHO via WHO Library                                                       | <a href="https://www.who.int/publications/">https://www.who.int/publications/</a>           | 24/01/2023     |
| European Observatory on Health System and Policies                        | <a href="https://eurohealthobservatory.who.int/">https://eurohealthobservatory.who.int/</a> | 24/01/2023     |
| Asia Pacific Observatory on Health Systems and Policies                   | <a href="https://apo.who.int/">https://apo.who.int/</a>                                     | 24/01/2023     |
| North American Observatory on Health Systems and Policies (NAO)           | <a href="https://naohealthobservatory.ca/">https://naohealthobservatory.ca/</a>             | 24/01/2023     |
| African Health Observatory Platform on Health Systems and Policies (AHOP) | <a href="https://ahop.aho.afro.who.int/">https://ahop.aho.afro.who.int/</a>                 | 24/01/2023     |

**Table S7.** List of manually searched journals

| Journal name                                          | Website/Link                                                                                                                                                                                                    | Date of access |
|-------------------------------------------------------|-----------------------------------------------------------------------------------------------------------------------------------------------------------------------------------------------------------------|----------------|
| International Journal of Health Policy and Management | <a href="https://www.ijhpm.com/">https://www.ijhpm.com/</a>                                                                                                                                                     | 23/01/2023     |
| Lancet health policy reform series                    | <a href="https://www.thelancet.com/series/health-system-reform-in-mexico">https://www.thelancet.com/series/health-system-reform-in-mexico</a>                                                                   | 23/01/2023     |
| Health Policy                                         | <a href="https://www.sciencedirect.com/journal/health-policy">https://www.sciencedirect.com/journal/health-policy</a>                                                                                           | 23/01/2023     |
| Health Systems & Reform (HS&R)                        | <a href="https://www.tandfonline.com/action/journalInformation?show=journalMetrics&amp;journalCode=khsr20">https://www.tandfonline.com/action/journalInformation?show=journalMetrics&amp;journalCode=khsr20</a> | 23/01/2023     |
| Health Reform Observer                                | <a href="https://mulpress.mcmaster.ca/hro-ors/index">https://mulpress.mcmaster.ca/hro-ors/index</a>                                                                                                             | 23/01/2023     |
| Journal of Health Politics, Policy and Law            | <a href="https://www.dukeupress.edu/journal-of-health-politics-policy-and-law">https://www.dukeupress.edu/journal-of-health-politics-policy-and-law</a>                                                         | 23/01/2023     |
| Health affairs                                        | <a href="https://www.healthaffairs.org/">https://www.healthaffairs.org/</a>                                                                                                                                     | 23/01/2023     |
